# Supplementary material for: Toward a general calibration of the Swiss plate geophone system for fractional bedload transport
Source: Copernicus journal article supplement (doi:10.5194/esurf-2022-7), 2022-02-09
Supplement: Supplementary file [file esurf-2022-7-AC1-supplement.pdf]

## Response to the comments made by Referee #1

Dear Referee #1,

We appreciate your valuable comments and the several points you have raised regarding key elements of the manuscript. We also very much appreciate that you went through the study in such a thorough manner. We believe that your comments, questions and suggestions significantly helped to improve it. We agreed with most of your suggestions, and have made the modifications accordingly. Below, your comments are reported in italics, and our responses in normal font (blue color). The indicated line numbers refer to the tracked-changes version of the revised manuscript.

**Comment 1:** *This paper is a new contribution of the WSL team on the Swiss Plate geophone measurement technic. The author propose a method of analysis accounting for elastic waves resulting from impacts occurring outside the plate boundaries, with the final objective being to propose a general site-independent calibration procedure. They use both flume and field observations. This contribution will undoubtedly be of interest to the entire community using this technique. The paper is well written and the science is of good quality. However I found the paper a bit long and sometimes difficult to understand. I made a few proposition to improve the text. I propose minor revision.*

**Response:** We kindly thank you for your positive comments on our work. We agree that the paper was quite long and that the clarity could be improved. As described in the following answers to your comments, we focused in particular on Section 2.5.2 (Lines 252-303) in order to clarify the procedure leading to the lower and upper threshold values. Another key element is certainly Figure 7. In order to clarify the effect of the new thresholds when applied to SPG data, we have included a short quantitative analysis of Figure 7 to Section 3.1 (Lines 338-369).

**Comment 2:** *Fig1: in the preprocessed signal do you record a value for each threshold or only the maximum?*

**Response:** While this study focuses on packets, most earlier publications on the SPG system were using impulse counts as proxy for bedload transport. In the preprocessed signal, we store the total number of packets or impulses detected for each class  $j$  within one minute (defined by the threshold amplitudes). Packets are classified and counted on the basis of their maximum amplitude (i.e. one unique amplitude value is recorded per packet), and impulses, which are discrete points in time, simply on the basis of their amplitude. However, for this study, we used the full raw data that was recorded for all calibration measurements. We have changed the formulation in the first paragraph of section 2.1 (Lines 100-106), to put less emphasis on the preprocessed signal.

**Comment 3:** *Line 116: what was the mesh size for direct sampling? And related question: what is the size minimum detected by the SPG?*

**Response:** The lower size detection threshold is assumed to be around 10 mm. The lower amplitude threshold of 0.0216 V corresponds to a particle size of 9.5 mm. We have added two sentences clarifying this on Lines 96-97 and 128. From flume experiments, however, we know that particles of that size generate only few packets per unit mass (Wyss et al., 2016a; Nicollier et al. 2021). This limitation is probably related to the important mass of a steel plate.

We have therefore chosen the mesh size of the nets used to collect samples accordingly to this detection threshold. The mesh size was 8 mm at the Albula and the Navisence, and 6 mm at the Avançon de Nant site, where the flow was much weaker. One reason for choosing such large mesh sizes was to reduce the flow resistance of the net sampler in order to improve the sampling efficiency. We have added the mesh size information in Section S1 of the Supporting Information, where the calibration measurements are described in more details.

- Wyss, C. R., Rickenmann, D., Fritschi, B., Turowski, J., Weitbrecht, V., and Boes, R.: Measuring bed load transport rates by grain-size fraction using the Swiss plate geophone signal at the Erlenbach, *J. Hydraul. Eng.*, 142(5), [https://doi.org/10.1061/\(ASCE\)HY.1943-7900.0001090,04016003](https://doi.org/10.1061/(ASCE)HY.1943-7900.0001090,04016003), 2016a.
- Nicollier, T., Rickenmann, D., and Hartlieb, A.: Field and flume measurements with the impact plate: Effect of bedload grain-size distribution on signal response, *Earth Surf. Processes Landforms*, 17 pp., <https://doi.org/10.1002/esp.5117>, 2021.

**Comment 4:** *Line 118: a bedload sample is a mass collected for a given duration. It means that the corresponding “packet” is not the response of a single grain impact but probably a complex signal resulting from many impacts (or even a bedload pulse response)?*

**Response:** In most cases, because of the high sampling frequency of the geophone signal (10'000 Hz), one packet contains the signal response corresponding to one single particle impact only. As discussed in Sect. 4.4, we hypothesize that at higher transport rates, the frequency of packets containing the signal response to more than one impact is expect to increase, and thus there may be some overlapping recording of packets. In future work, it could be worth investigating if splitting up such longer packets in sub-packets, each containing the signal responses to one single impact, results in different calibration coefficients.

**Comment 5:** *Line 119: what are the signification of the different letters in  $k_{b,i,j}$ ?*

**Response:** The letter b is the standard subscript of the calibration coefficient (e.g. Wyss et al., 2016a), the letter *i* stands for the sample's index, and the letter *j* stands for the size class. We have noticed that it is certainly too early to introduce the calibration coefficient  $k_{b,i,j}$  at this stage, since it appears only later in the text,

when describing Eq. 6. In order to avoid any confusion, we have removed the variable and kept only “calibration coefficient” (see Line 126).

- Wyss, C. R., Rickenmann, D., Fritschi, B., Turowski, J., Weitbrecht, V., and Boes, R.: Measuring bed load transport rates by grain-size fraction using the Swiss plate geophone signal at the Erlenbach, *J. Hydraul. Eng.*, 142(5), [https://doi.org/10.1061/\(ASCE\)HY.1943-7900.0001090,04016003](https://doi.org/10.1061/(ASCE)HY.1943-7900.0001090,04016003), 2016a.

**Comment 6:** *Table 1: how was measured the flow velocity (surface?)*

**Response:** The depth-averaged mean flow velocity values were derived from flow measurements conducted during the calibration measurements using following systems: an magnetic-inductive flow meter OTT MF Pro (at the Albula and Navisence sites), a radar-based stage sensor Vegapuls WL 61 (Avançon de Nant site), and a 2-D laser sensor TiM551 by SICK AG© (Erlenbach site). We have added to the legend the name of the different devices used to derive flow velocities (Lines 145-147).

**Comment 7:** *Line 146: you mean “uniform mixture”?*

**Response:** This is indeed what is meant here. Our experience from a recent publication (Nicollier et al., 2022) has shown that people tend to be quite confused by the combination of “uniform” and “mixture”. Therefore, in order to avoid any confusion, we have decided to formulate this sentence letting aside the word “mixture” (“with a fixed number of grains for each of the ten particle-size”).

- Nicollier, T., Antoniazza, G., Rickenmann, D., Hartlieb, A., and Kirchner, J.W.: Improving the calibration of impact plate bedload monitoring systems by filtering out acoustic signals from extraneous particle impacts. *Earth Space Sci.*, 9, e2021EA001962, <https://doi.org/10.1029/2021EA001962>, 2022.

**Comment 8:** *Line 173-174: what happens when several grains hit the plate simultaneously? (the question concerns SPG in the field)*

**Response:** In the current signal processing procedure and packet definition, such a situation might result in a large packet containing multiple larger peaks. Such a packet would be a typical example of signal saturation. We address this issue in further detail in Section 4.4 in order to not overload the methodology part with too much information. Please refer to our response to your comment no. 30.

**Comment 9:** *Table 3: it is very difficult to understand this table and its title*

**Response:** We have reformulated the caption of the table and have removed the information concerning the manual sorting of the upper classes, which did not add any relevant information and might have been confusing.

**Comment 10:** *Line 180: Is this equation is site specific? First the material: can we consider that all sensors have exactly the same response? Secondly the bedload data may be specific to Erlenbach (mode of transport, grains velocity, density...)?*

**Response:** This is an interesting question. In fact, this equation has been implemented at several sites, regardless of the different factors you have listed. From calibration measurements at different field sites (Rickenmann et al., 2014; Wyss et al. 2016a), from flume experiments using particles from different field sites (Wyss et al. 2016b), and from controlled impact tests conducted at multiple sites (Antoniazza et al., 2020), we know that SPG plates have in general a comparable signal response. But if we combine the small variability in signal response among plates to the variability in transport conditions and bedload specificities, it would be reasonable to expect a certain variability in the instrument response. In the discussion (Lines 536-612), we cite the flow velocity, the transport mode, the saltation length, etc. as possible factors influencing the signal response, whether it is the amplitude of the geophone signal or the number of detections per unit mass. However, these factors become particularly relevant when it comes to the transfer of a calibration relationship to another monitoring station. As long as we consider a given station per se, we consider that the effects of these factors are included in the site-specific calibration relationship.

- Antoniazza, G., Nicollier, T., Wyss, C. R., Boss, S., and Rickenmann, D.: Bedload transport monitoring in alpine rivers: Variability in Swiss plate geophone response, *Sensors*, 20, <https://doi.org/10.3390/s20154089>, 2020.
- Rickenmann, D., Turowski, J. M., Fritschi, B., Wyss, C., Laronne J.B., Barzilai, R., et al.: Bedload transport measurements with impact plate geophones: comparison of sensor calibration in different gravel-bed streams, *Earth Surf. Processes Landforms*, 39, 928–942, <https://doi.org/10.1002/esp.3499>, 2014.
- Wyss, C. R., Rickenmann, D., Fritschi, B., Turowski, J., Weitbrecht, V., and Boes, R.: Measuring bed load transport rates by grain-size fraction using the Swiss plate geophone signal at the Erlenbach, *J. Hydraul. Eng.*, 142(5), [https://doi.org/10.1061/\(ASCE\)HY.1943-7900.0001090,04016003](https://doi.org/10.1061/(ASCE)HY.1943-7900.0001090,04016003), 2016a.
- Wyss, C. R., Rickenmann, D., Fritschi, B., Turowski, J., Weitbrecht, V., and Boes, R.: Laboratory flume experiments with the Swiss plate geophone bed load monitoring system: 1. Impulse counts and particle size identification, *Water Resour. Res.*, 52, 7744–7759, <https://doi.org/10.1002/2015WR018555>, 2016b.

**Comment 11:** *Line 183: I don't understand. You use the measured packets with Eq.1 for computing each size class present in a bedload mixture?*

**Response:** Eq. 1 relates the amplitude of the SPG signal to the size of an impacting particle. So yes indeed, the AH method proposed by Wyss et al. (2016a) relies on this relationship to estimate the particle sizes present in a bedload mixture. In order to clarify this, we have rephrased the sentence on Lines 200-201.

- Wyss, C. R., Rickenmann, D., Fritschi, B., Turowski, J., Weitbrecht, V., and Boes, R.: Measuring bed load transport rates by grain-size fraction using the Swiss plate geophone signal at the Erlenbach, *J. Hydraul. Eng.*, 142(5), [https://doi.org/10.1061/\(ASCE\)HY.1943-7900.0001090,04016003](https://doi.org/10.1061/(ASCE)HY.1943-7900.0001090,04016003), 2016a.

**Comment 12:** *Line 200: why “in the lower size class”? I would expect that only large particles produce extraneous impacts?*

Response: It is right that only large particles produce impacts that are detectable by the SPG system (e.g. Nicollier et al. 2022). However, when the SPG system is impacted by such a large particle, the propagating signal attenuates along its travel path, and the neighboring sensors only detect a fraction of the energy released on the impacted plate. The apparent packets recorded by these sensors will therefore mainly be “falsely” classified in lower size classes. We have rephrased the sentence on Lines 209-211 to clarify this.

- Nicollier, T., Antoniazza, G., Rickenmann, D., Hartlieb, A., and Kirchner, J.W.: Improving the calibration of impact plate bedload monitoring systems by filtering out acoustic signals from extraneous particle impacts. *Earth Space Sci.*, 9, e2021EA001962, <https://doi.org/10.1029/2021EA001962>, 2022.

**Comment 13:** *Line 234-235: “The transported bedload mass associated with an individual signal packet is strongly dependent on the size of the impacting particle” what is difficult with such a sentence is that we don’t really understand if you describe the movement of a single particle or of a bedload mixture.*

Response: We agree that beginning the sentence with “bedload mass” can be somewhat misleading. We have rephrased the sentence and have replaced “transported bedload mass” with “particle mass” to make it clearer that we describe a single particle (Line 253).

**Comment 14:** *Line 237: hard to follow. If I understood well you will apply a threshold to both amplitude and frequency. In the next sentence “lower threshold” and “upper threshold” concerns amplitude or frequency?*

Response: The lower threshold is based on amplitude only, while the upper threshold is based on both amplitude and frequency information. We have reformulated several parts of Section 2.5.2 (Lines 252-303) in order to clarify the origin and the aim of these thresholds.

**Comment 15:** *Line 250: could you tell a bit more about these coefficients?*

Response: In order to avoid overloading this already quite complex section, we have decided to add only a bit of additional information on this topic on Lines 270-271 to clarify the origin of these coefficients. More details can then be found in the indicated reference (Nicollier et al., 2022).

- Nicollier, T., Antoniazza, G., Rickenmann, D., Hartlieb, A., and Kirchner, J.W.: Improving the calibration of impact plate bedload monitoring systems by filtering out acoustic signals from extraneous particle impacts. *Earth Space Sci.*, 9, e2021EA001962, <https://doi.org/10.1029/2021EA001962>, 2022.

**Comment 16:** *Line 255: where do these equations come from? your experiments?*

Response: Yes, the entire Section 2.5.2 is based on the single-grain-size experiments we have run at the Obernach facility. To underline this, we have reminded on Lines 277-278 as well as in the caption of Figure 5 that individual grain-sizes were fed into the flume.

**Comment 17:** *Line 257: If I understood, by replacing  $D_{mj}$  (the sieve sizes) in Eq 4 and 5 the objective is to isolate the packets associated with a given size class? Not clear (same for figure 5)*

Response: Yes, by replacing the lower and upper sieve sizes of each grain-size class fed into the flume, we are able to derive the lower and upper thresholds used to assign a packet to a given class  $j$ . We have clarified this information on Lines 277-278, 281-283, and 298-299.

**Comment 18:** *Line 279: you must imagine that you present to somebody who knows nothing about your work. Since I am reading, I am still lost with your upper and lower threshold.*

Response: We agree that Section 2.5.2, in which the thresholds are being introduced, was perhaps not straightforward enough to follow. We have considerably reworked this section, so that the definition of thresholds should now be clearer to follow.

**Comment 19:** *Line 282: YES!! I have my answer!!*

Response: With the changes made to Section 2.5.2 we hope to have clarified this point already before the reader reaches Section 2.5.3.

**Comment 20:** *Line 284: The link between Eq.6 and 7 is not clear (I suppose that med station refers to all samples  $i$ )*

Response: We have clarified that the median is computed over all samples  $i$  on Line 314.

**Comment 21:** *Line 287: providing a general methodology for reducing the measurement uncertainties in a given site is already a nice objective. But the passage to a general inter-site calibration term is not trivial. It supposes that beside the plate response, all sites share the same transport characteristics. For instance if grains saltate over long distances (and different station length from one river to another) can we be sure that the impact rate reflect the real transport?*

Response: You are pointing to an important aspect. The goal of this paper is to investigate the feasibility of such a general calibration procedure, mainly by focusing on the bias introduced by the detection of apparent packets. The fact that both total and fractional fluxes are generally overestimated at low transport rates and underestimated at high transport rates (see Section 4.4) suggests that, already at a given site, variations of the transport conditions affect the SPG signal



response. When considering site-to-site variations of the transport conditions, it would therefore be reasonable to expect even larger differences. This is well visible when comparing the estimates obtained for the Erlenbach with the results obtained for the other three streams. The stochastic nature of bedload transport makes it difficult to establish accurate relationships between the transport mode, the transport rate and the SPG signal response. We have recently started an uncertainty analysis of the site-specific as well as of the general calibration relationships in order to better understand the relevance of such factors. But it is motivating that although there are multiple factors that are not yet integrated in the approach, the global calibration coefficient is working reasonably well.

**Comment 22:** *Line 346: the scatter is lower? Not so clear in the figure*

Response: We agree that for the largest four classes, there is barely a difference in scatter between the AH and the AF method. However an important reduction of scatter of the  $k_{b,i,j}$  coefficients is well visible for the six smallest classes. We have modified the sentence on Lines 378-379 accordingly.

**Comment 23:** *Figure 9: add the light grey dots in the legend*

Response: The legend has been changed as suggested. We also modified the legend of Figure S2 in the supporting information accordingly.

**Comment 24:** *Line 407: Direct sampling depends on the mesh size and the SPG measurements concern sizes >12mm. We know that in many mountain streams the contribution of gravels and sand can be very large. How can you take this into account?*

Response: You are right. As mentioned earlier, due to the lower detection limit of the SPG system and in order to reduce the flow resistance of the net sampler, we used a mesh size of 8 mm at the Albula and the Navisence, and a mesh size of 6 mm at the Avançon de Nant site, where the flow was much weaker. The SPG systems also does not detect particles  $< \sim 10$  mm. As such, there is still a range of bedload particle sizes that may not be detected. An interesting indication about the transported bedload mass that is missed by the SPG system, can be found in the bedload samples collected at the Avançon de Nant site, where we used the net with smallest mesh size across all calibration campaigns (6 mm). Due to clogging of the net particles down to 4 mm have also been trapped, and later sieved and weighted. On average over all samples collected at the Avançon de Nant, the mass of particles ranging from 4 to 9.5 mm (and thus not detected by the SPG system) represented proportions of the total sampled mass of around 0.16. Proportions of up to 0.44 have been observed at the Avançon de Nant. Rickenmann et al. (2018), report mean proportions of particles with sizes  $2 \text{ mm} < D < 10 \text{ mm}$  of around 0.22 from two other sites equipped with the

SPG system (Fischbach and Ruetz). This underlines that the SPG system only detects a part of the whole bandwidth of the transported bedload particle sizes.

Regarding the sensing, a possible solution could be to combine the SPG system to other types of sensors that have a higher sensitivity to smaller fractions. However, this could be quite challenging in such turbulent streams (e.g. ADCP). The use of accelerometers additionally to geophone sensors and thinner steel plates might already help to decrease the lower detection threshold (as indicated by both geophone and accelerometer sensors used at the Albula field site, see Rickenmann et al., 2017). A different approach would be to extrapolate the obtained grain-size distributions towards smaller fractions using models (e.g. Schneider et al., 2016) fed with the morphological and flow characteristics of the investigated site.

- Rickenmann, D., Antoniazza, G., Wyss, C.R., Fritschi, B. and Boss, S.: Bedload transport monitoring with acoustic sensors in the Swiss Albula mountain river. *Proceedings of the International Association of Hydrological Sciences*, 375, 5–10, <https://doi.org/10.5194/piahs-375-5-2017>, 2017.
- Rickenmann, D., Steeb, N., and Badoux, A.: Improving bedload transport determination by grain-size fraction using the Swiss plate geophone recordings at the Erlenbach stream, in River Flow 2018, *Proceedings of the 9th Int. Conference on Fluvial Hydraulics*, 8 pp., <https://doi.org/10.1051/e3sconf/20184002009>, 2018.
- Schneider, J. M., Rickenmann, D., Turowski, J. M., Schmid, B., and Kirchner, J. W.: Bed load transport in a very steep mountain stream (Riedbach, Switzerland): Measurement and prediction, *Water Resour. Res.*, 52, 9522–9541, <https://doi.org/10.1002/2016WR019308>, 2016.

**Comment 25:** *Figure 10: How do you explain a small tendency to overprediction for lower transport?*

Response: Inversely to the underestimated transport rate at high transport intensities (Section 4.4), we can expect a stronger signal response (i.e.  $k_{b,i,j} > k_{b,med,j}$ ) at lower transport intensities due to lower flow velocities, shorter saltation lengths, and unsaturated signal, which would all result in an increased amount of detected packets per unit weight. We have added this consideration on Lines 578.

**Comment 26:** *Line 405: it questions on the pertinence of a general calibration coefficient. Also, many sites are equipped with SPG. Could it be possible to test the calibration coefficient with other sites?*

Response: The presented procedure uses frequency information and thus relies on the recording of parts of the raw signal at the field monitoring station. Until now, packets and the signal they contain are being recorded at the four stations presented in this study only. At the other sites equipped with the SPG system, the recording of packets has unfortunately not been implemented yet. There, the field computers record only summary values such as the number of



impulses per minute, maximum amplitude, etc. which do not allow any frequency-based analysis of the SPG signal. Since the three natural sites show a relatively good agreement, it would indeed have been of major interest to apply the developed procedure to other calibrated field monitoring stations. A sentence has been added on Lines 119-120 to explain the choice of these four stations.

**Comment 27:** *§4.1: the paper is already very long and not easy to read. Is this paragraph really necessary? Or maybe to be reduced.*

Response: We have shortened the section as suggested.

**Comment 28:** *Line 484: It partly answer to see my previous comment about limitations of a general calibration*

Response: For further explications, please refer to our response to your comment no. 26.

**Comment 29:** *Line 488: Huge question which also concerns the contribution of finer fraction, how the saltation length of large elements affect the SPG detection...*

Response: Yes, indeed. In our opinion this is one of the most important sections, that aims to remind to the reader that the development of a general calibration procedure certainly requires a large set of calibration measurements, but above all a clean and consistent bedload sampling across all sites, which is challenging to evaluate. As mentioned on Lines 536-557, keys to improve the calibration accuracy are certainly to collect large samples and avoid short sampling intervals. Doing so enables us to 1) average over stochastic factors such as the impact location, which depends on the saltation length, and 2) to sample a representative range of particle sizes. Considering these points, it is not necessarily a disadvantage that the SPG system does not detect particles smaller than around 10 mm. In fact, if smaller fractions (< 9.5 mm) had to be sampled accurately, the whole sampling procedure would be significantly more difficult due to the use of a smaller mesh size (i.e. higher flow resistance, faster filling, shorter sampling intervals).

**Comment 30:** *Line 519: "In our SPG data, we have observed long packets containing multiple large peaks corresponding to several impacts occurring so quickly after one another that they were not detected as separate packets". It's a shame that this comment appears at the end of the manuscript because it's the image we immediately have in mind, which doesn't match the definition of the package in Figure 1. It could be worth to explain early how you considers this aspect in your analysis.*

Response: Following your suggestion, we have added a sentence on Lines 227-229 to address this problematic already earlier in the text. The evaluation of the relevance of packets containing multiple impacts and the development of a

procedure to split them into sub-packets could represent an interesting topic for future research.

**Comment 31:** §4.5 same comment. *From the beginning I suspect grains velocity to play a role in the SPG response. I regret that this parameter is totally occulted in the paper. Even if you do not consider it in the analysis, it could be introduced earlier.*

**Response:** The lack of continuous flow stage recordings is certainly one of the missing links in this study. It would have been interesting to combine the findings from the flume experiments performed by Wyss et al. (2016c) to a new and extensive set of stream flow measurements from four different sites to improve the presented procedure. But the fact that the three watercourses characterized by a natural bed show similar instrument responses across multiple grain-size classes even though they are characterized by different mean flow velocities (Figure 8), possibly suggests that further factors such as the bed morphology also heavily influence the SPG response. In order to inform the reader already earlier in the text about the relevance of the flow velocity, we have added some explanations on Lines 123-127.

- Wyss, C. R., Rickenmann, D., Fritschi, B., Turowski, J., Weitbrecht, V., Travaglini E, et al.: Laboratory flume experiments with the Swiss plate geophone bed load monitoring system: 2. Application to field sites with direct bed load samples, *Water Resour. Res.*, 52, 7760–7778, <https://doi.org/10.1002/2016WR019283>, 2016c.

### **Further minor changes**

We have also made some further minor changes to the original manuscript. These mainly concern typos, update of recently published references, and general reformulations of terms or sentences. All changes can be found in the “tracked-changes” version of the manuscript.
